# Supplementary material
Source: PubMed Central journal article supplement (PMC6935928)
Supplement: JCM.01178-19-s0001.pdf [file JCM.01178-19-s0001.pdf]

**TABLE S1** Distribution of dBLIM inhibition zone diameters among spiked blood culture (aerobic and anaerobic bottles) according to meropenem MICs (for carbapenemase-producing *Enterobacterales*, n = 162) and cefotaxime MICs (for extended-spectrum-cephalosporinase-producing *Enterobacterales*, n = 144)

| Blood cultures spiked with carbapenemase-producing <i>Enterobacterales</i> |           |      |       |      |          |      |    |      |
|----------------------------------------------------------------------------|-----------|------|-------|------|----------|------|----|------|
| MEM MIC (mg/l)                                                             | MEM 10 µg |      |       |      | CTX 5 µg |      |    |      |
|                                                                            | ≤ 6       | 7-12 | 13-14 | ≥ 15 | ≤ 6      | 7-12 | 13 | ≥ 14 |
| 0.25-2                                                                     | 22        | 4    | 4     | 4    | 31       | 2    | 1  | 0    |
| >2-4                                                                       | 19        | 2    | 1     | 8    | 20       | 5    | 2  | 3    |
| >4-8                                                                       | 40        | 8    | 1     | 5    | 51       | 1    | 1  | 1    |
| >8                                                                         | 191       | 8    | 2     | 5    | 198      | 5    | 2  | 1    |

  

| Blood cultures spiked with extended-spectrum-cephalosporinase-producing <i>Enterobacterales</i> |           |      |       |      |          |      |    |      |
|-------------------------------------------------------------------------------------------------|-----------|------|-------|------|----------|------|----|------|
| CTX MIC (mg/l)                                                                                  | MEM 10 µg |      |       |      | CTX 5 µg |      |    |      |
|                                                                                                 | ≤ 6       | 7-12 | 13-14 | ≥ 15 | ≤ 6      | 7-12 | 13 | ≥ 14 |
| 1-8                                                                                             | 0         | 0    | 0     | 34   | 25       | 7    | 1  | 1    |
| >8-16                                                                                           | 0         | 0    | 0     | 58   | 39       | 14   | 4  | 1    |
| >16                                                                                             | 0         | 0    | 0     | 196  | 166      | 23   | 0  | 7    |

dBLIM breakpoints and interpretation criteria: np-ESBL/ACBL/CARB EB: MEM ≥ 15, CTX ≥ 14; ESBL-producing EB: MEM ≥ 15, CTX ≤ 12; Carbapenemase-producing EB: MEM ≤ 12; ATU: MEM = 13-14, CTX = 13.

Abbreviations: MEM, meropenem; CTX, cefotaxime; ESBL, extended-spectrum-β-lactamases; ACBL, AmpC-type-β-lactamases; np-ESBL/ACBL/CARB, extended-spectrum-β-lactamases /AmpC-type-β-lactamases/carbapenemases-non-producing; EB, *Enterobacterales*, ATU, area of technical uncertainty.
